# Supplementary material for: The effect of ketamine on the consolidation and extinction of contextual fear memory
Source: PubMed Central journal article supplement (PMC5818023; doi:10.1177/0269881117748903), 2018-01-17
Supplement: JOP748903_Supplementary_Material.pdf [file JOP748903_Supplementary_Material.pdf]

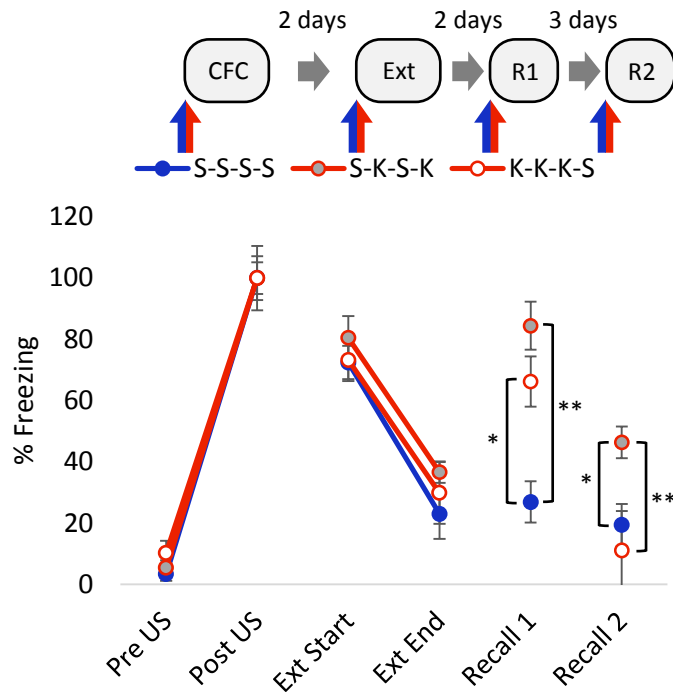

**Supplementary Figure 1** The effect of 25 mg/kg ketamine on fear extinction. Experimental groups expanded to show order of treatment. Displayed are the first (Ext Start) and last (Ext End) 2 mins of the extinction trial. 25 mg/kg ketamine or saline vehicle was administered IP 30 min before trials.  $n=6$  per group. In recall trials, ketamine-treated rats received either the same (Recall 1) or different (Recall 2) administration to that received prior to conditioning. Data represented by mean  $\pm$ SEM of percent freezing response normalised to Post-US. \*\* $P<0.01$ , \* $P<0.05$  in one-way ANOVA with Tukey's multiple comparisons test. CFC, contextual fear conditioning; Ext, Extinction trial; R1, Recall 1; US, unconditioned stimulus; S, saline; K, ketamine.

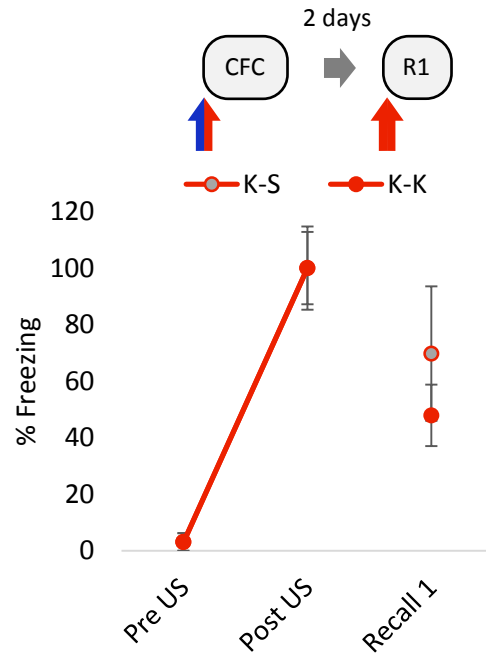

**Supplementary Figure 2** 8 mg/kg ketamine does not induce a state-dependent contextual fear memory. Ketamine (8 mg/kg) or saline vehicle was administered IP 30 min before conditioning and recall trials. n=4. Data represented by mean  $\pm$ SEM of percent freezing response normalised to Post-US. CFC, contextual fear conditioning; R1, Recall 1; K, ketamine; S, saline; US, unconditioned stimulus.

**Supplementary Table 1** Group size calculations

| <b>Effect size</b> | <b>Power</b> | <b>Required N per group</b> |
|--------------------|--------------|-----------------------------|
| 1.5                | 0.8          | 9                           |
| 2.0                | 0.8          | 6                           |
| 2.5                | 0.8          | 4                           |
| 3.0                | 0.8          | 4                           |

Predicted effect size (Hedges' *g*; based on previous studies) and target power were used to estimate the required number of subjects (N) per group.

**Supplementary Table 2** Contextual fear conditioning experiments freezing data

| <b>Group</b>                                                                 | <b>N</b> | <b>Pre-US<br/>(mean±SEM)</b> | <b>Post-US<br/>(mean±SEM)</b> | <b>Recall 1<br/>(mean±SEM)</b> | <b>Recall 2<br/>(mean±SEM)</b> | <b>Recall 3<br/>(mean±SEM)</b> |
|------------------------------------------------------------------------------|----------|------------------------------|-------------------------------|--------------------------------|--------------------------------|--------------------------------|
| The effect of 25 mg/kg pre-training ketamine on contextual fear conditioning |          |                              |                               |                                |                                |                                |
| S-S                                                                          | 6        | 1.39±1.39                    | 69.44±10.02                   | 75.00±10.32                    | 52.78±10.90                    | 50.00±9.13                     |
| K-K                                                                          | 6        | 6.94±3.34                    | 63.89±5.12                    | 6.94±3.98                      | 31.94±12.44                    | 18.06±3.98                     |
| The effect of 8 mg/kg pre-training ketamine on contextual fear conditioning  |          |                              |                               |                                |                                |                                |
| K-S                                                                          | 4        | 2.08±2.08                    | 62.50±7.98                    | 43.75±16.80                    | -                              | -                              |
| K-K                                                                          | 4        | 2.08±2.08                    | 54.17±7.98                    | 27.08±8.59                     | -                              | -                              |

Mean ± SEM percent freezing without normalisation to post-US levels.

**Supplementary Table 3** Extinction experiments freezing data

| Group                                                                                     | N | Pre-US<br>(mean±SEM) | Post-US<br>(mean±SEM) | Ext Start<br>(mean±SEM) | Ext End<br>(mean±SEM) | Recall 1<br>(mean±SEM) | Recall 2<br>(mean±SEM) |
|-------------------------------------------------------------------------------------------|---|----------------------|-----------------------|-------------------------|-----------------------|------------------------|------------------------|
| The effect of 25 mg/kg pre-training ketamine on the extinction of contextual fear memory  |   |                      |                       |                         |                       |                        |                        |
| S-S-S-S                                                                                   | 6 | 2.78±1.76            | 83.33±4.30            | 59.72±3.98              | 18.06±5.86            | 22.22±5.56             | 15.28±4.52             |
| S-K-S-K                                                                                   | 6 | 4.17±1.86            | 77.78±5.56            | 61.11±3.51              | 29.17±4.69            | 66.67±8.87             | 36.11±5.12             |
| K-K-K-S                                                                                   | 6 | 6.94±2.56            | 63.89±6.69            | 45.8±4.69               | 18.06±5.01            | 40.28±8.45             | 8.33±6.80              |
| The effect of 8 mg/kg pre-training ketamine on the extinction of contextual fear memory   |   |                      |                       |                         |                       |                        |                        |
| S-S                                                                                       | 6 | 1.39±1.39            | 80.56±7.95            | 61.11±11.92             | 20.83±8.54            | 25.00±8.87             | 26.39±9.96             |
| S-K                                                                                       | 6 | 1.39±1.39            | 63.89±5.12            | 52.78±7.66              | 12.50±2.85            | 12.50±4.17             | 6.94±4.52              |
| K-S                                                                                       | 6 | 1.39±1.39            | 63.89±6.69            | 59.72±10.85             | 16.67±6.80            | 33.33±9.86             | 22.22±4.12             |
| K-K                                                                                       | 6 | 4.17±2.85            | 58.33±5.69            | 61.11±12.67             | 20.83±8.81            | 38.89±10.47            | 41.67±10.76            |
| The effect of 25 mg/kg post-training ketamine on the extinction of contextual fear memory |   |                      |                       |                         |                       |                        |                        |
| S-S-S                                                                                     | 6 | 2.78±1.76            | 75.00±3.73            | 58.33±7.45              | 20.83±5.16            | 27.78±6.33             | 41.67±8.05             |
| S-K-S                                                                                     | 6 | 1.39±1.39            | 75.00±5.69            | 58.33±6.45              | 30.56±3.51            | 29.17±8.54             | 26.39±6.60             |
| K-K-S                                                                                     | 6 | 2.78±1.76            | 66.67±7.45            | 68.06±11.67             | 16.67±8.61            | 26.39±7.27             | 37.5±5.59              |

Mean ± SEM percent freezing without normalisation to post-US levels. US, unconditioned stimulus; Ext, extinction trial; S, saline; K, ketamine.
